# Supplementary material for: Surface Properties of Graffiti Coatings on Sensitive Surfaces Concerning Their Removal with Formulations Based on the Amino-Acid-Type Surfactants
Source: MDPI journal article supplement (doi:10.3390/molecules28041986), 2023-02-20
Supplement: s1 [file s1]

## SUPPLEMENTARY MATERIAL

Article

# Surface properties of graffiti coatings on sensitive surfaces concerning their removal with formulations based on the amino-acid type surfactants

Marcin Bartman <sup>1</sup>, Sebastian Balicki <sup>1</sup>, Lucyna Hołysz <sup>2</sup> and Kazimiera A. Wilk <sup>1,\*</sup>

<sup>1</sup> Department of Engineering and Technology of Chemical Processes. Wrocław University of Science and Technology. Wybrzeże Wyspiańskiego 27. 50-370 Wrocław. Poland

<sup>2</sup> Institute of Chemical Sciences. Faculty of Chemistry. Maria Curie-Skłodowska University. Plac M. Curie-Skłodowska 3. 20-031 Lublin. Poland

\* Correspondence: kazimiera.wilk@pwr.edu.pl; Tel. +48 71 320 2828

### Table of Contents

**Figure S1.** Image of the painted with black paint of sensitive surfaces with a enlargement of 100x

**Table S1.** Physicochemical characteristic of the product after atmospheric homogenization (P = 0.1 MPa. 700 RPM).

**Table S2.** Physicochemical characterization of the products after HPH at P = 100 MPa and after five cycles of homogenization.

**Equation S1.** The second-order polynomial function derived from the **D**-optimal design model.

**Table S3.** The custom built (3–4)<sup>3</sup> factorial D-optimal design, with corresponding variables and their levels.

**Table S4.** A quadratic D-Optimal randomized design experimental matrix of three independent variables with their corresponding values and analyzed response factors Y<sub>1</sub> – Y<sub>5</sub>: particle diameter, PDI, TSI after 0 days, TSI after 7 days, and TSI after 30 days respectively.

**Text S1.** Description of the ANOVA evaluation of the D-optimal model fitting of the experimental results, followed by analysis of the relationship between independent and dependent variables.

**Equation S2 – S6.** polynomial regression equations that emerged from the ANOVA analysis of D-optimal model for particular response factors.

**Table S5.** ANOVA results for D-optimal randomized design quadratic model for dependent variables of graffiti remover w/o nanoemulsion formulations.

**Figure S2.** A graphical representation of the randomized quadratic D-optimal design response surfaces for the dependent variables Y<sub>1</sub> = diameter, Y<sub>2</sub> = PDI, Y<sub>3</sub> = TSI (0 days), Y<sub>4</sub> = TSI (7 days), and Y<sub>5</sub> (TSI 30 days) vs. independent variables (concentration of AAS (A), HPH pressure (B) as a function of AAS type used: SLG).

**Figure S3.** A graphical representation of the randomized quadratic D-optimal design response surfaces for the dependent variables Y<sub>1</sub> = diameter, Y<sub>2</sub> = PDI, Y<sub>3</sub> = TSI (0 days), Y<sub>4</sub> = TSI (7 days), and Y<sub>5</sub> (TSI 30 days) vs. independent variables (concentration of AAS (A), HPH pressure (B) as a function of AAS type used: SCCG).

**Figure S4.** A graphical representation of the randomized quadratic D-optimal design response surfaces for the dependent variables Y<sub>1</sub> = diameter, Y<sub>2</sub> = PDI, Y<sub>3</sub> = TSI (0 days), Y<sub>4</sub> = TSI (7 days), and Y<sub>5</sub> (TSI 30 days) vs. independent variables (concentration of AAS (A), HPH pressure (B) as a function of AAS type used: SCMT).

**Figure S5.** A graphical representation of the randomized quadratic D-optimal design response surfaces for the dependent variables Y<sub>1</sub> = diameter, Y<sub>2</sub> = PDI, Y<sub>3</sub> = TSI (0 days), Y<sub>4</sub> = TSI (7 days), and Y<sub>5</sub> (TSI 30 days) vs. independent variables (concentration of AAS (A), HPH pressure (B) as a function of AAS type used: SCG).

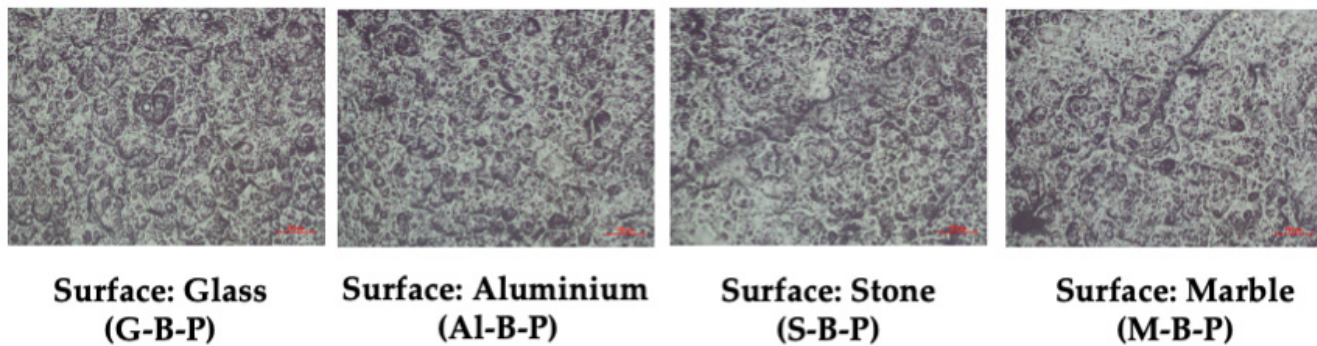

**Figure S1.** Image of the painted with black paint of sensitive surfaces with a enlargement of 100x

**Table S1.** Physicochemical characteristic of the product after atmospheric homogenization (P = 0.1 MPa. 700 RPM).

|                                      | SLG   |       |       | SCCG  |       |        | SCMT  |       |       | SCG   |       |       |
|--------------------------------------|-------|-------|-------|-------|-------|--------|-------|-------|-------|-------|-------|-------|
| Pre-emulsion no.                     | 1     | 2     | 3     | 4     | 5     | 6      | 7     | 8     | 9     | 10    | 11    | 12    |
| Concentration (mol/dm <sup>3</sup> ) | 0.05  | 0.075 | 0.1   | 0.05  | 0.075 | 0.1    | 0.05  | 0.075 | 0.1   | 0.05  | 0.075 | 0.1   |
| 0 days storage                       |       |       |       |       |       |        |       |       |       |       |       |       |
| D <sub>H</sub> (μm)                  | 4.768 | 6.537 | 8.322 | 5.213 | 9.372 | 11.013 | 3.523 | 4.824 | 5.152 | 1.162 | 3.389 | 5.151 |
| D <sub>H</sub> S.D. ± (μm)           | 0.942 | 1.046 | 1.288 | 0.877 | 2.573 | 4.124  | 0.772 | 0.887 | 0.976 | 0.232 | 0.693 | 0.886 |
| PDI                                  | 0.039 | 0.026 | 0.024 | 0.028 | 0.075 | 0.140  | 0.048 | 0.034 | 0.036 | 0.040 | 0.042 | 0.030 |
| TSI (60 min storaged)                | 1.41  | 2.09  | 3.64  | 2.74  | 3.47  | 5.13   | 1.35  | 2.43  | 2.52  | 0.11  | 0.13  | 0.16  |
| TSI 7 days storage                   | 2.54  | 5.17  | 8.58  | 25.45 | 45.27 | 79.64  | 3.19  | 5.09  | 6.68  | 2.70  | 2.83  | 3.35  |
| TSI 1 months storage                 | 5.02  | 7.06  | 10.69 | x     | x     | x      | 6.71  | 8.46  | 10.54 | 4.91  | 5.93  | 6.90  |
| TSI 3 months storage                 | 8.88  | 12.56 | 18.61 | x     | x     | x      | 9.66  | 12.19 | 15.28 | 6.14  | 7.29  | 8.70  |

**Table S2.** Physicochemical characterization of the products after HPH at P = 100 MPa and after five cycles of homogenization.

|                                      | SLG   |       |       | SCCG  |       |       | SCMT  |       |       | SCG   |       |       |
|--------------------------------------|-------|-------|-------|-------|-------|-------|-------|-------|-------|-------|-------|-------|
| NE no.                               | 1     | 2     | 3     | 4     | 5     | 6     | 7     | 8     | 9     | 10    | 11    | 12    |
| Concentration (mol/dm <sup>3</sup> ) | 0.05  | 0.075 | 0.1   | 0.05  | 0.075 | 0.1   | 0.05  | 0.075 | 0.1   | 0.05  | 0.075 | 0.1   |
| 0 days storage                       |       |       |       |       |       |       |       |       |       |       |       |       |
| D <sub>H</sub> (nm)                  | 2537  | 3580  | 4696  | 2710  | 4790  | 5763  | 1696  | 2401  | 2473  | 746   | 1984  | 2720  |
| D <sub>H</sub> S.D. ± (nm)           | 494   | 648   | 803   | 631   | 1312  | 2103  | 297   | 479   | 498   | 109   | 318   | 462   |
| PDI                                  | 0.038 | 0.033 | 0.029 | 0.054 | 0.075 | 0.133 | 0.031 | 0.040 | 0.041 | 0.021 | 0.026 | 0.029 |
| TSI (60 min storaged)                | 1.51  | 2.26  | 3.35  | 1.82  | 2.26  | 3.31  | 1.02  | 1.95  | 2.21  | 0.09  | 0.11  | 0.14  |
| TSI 7 days storage                   | 2.73  | 4.75  | 8.05  | 25.41 | 36.15 | 57.99 | 2.40  | 4.97  | 5.84  | 0.84  | 1.10  | 1.56  |
| TSI 1 months storage                 | 6.54  | 13.29 | 26.55 | x     | x     | x     | 6.01  | 15.40 | 18.68 | 2.36  | 3.19  | 4.68  |
| TSI 3 months storage                 | 7.20  | 15.15 | 31.60 | x     | x     | x     | 6.37  | 16.93 | 20.92 | 3.07  | 4.28  | 6.55  |

The existing relationship between response factors and independent variables is represented by the second-order polynomial function derived from the D-optimal design model:

$$Y_1, Y_2, Y_3, Y_4 \text{ or } Y_5 = \beta_0 + \beta_1 A + \beta_2 B + \beta_3 C + \beta_{1,2} AB + \beta_{1,3} AC + \beta_{2,3} BC + \beta_{1,1} A^2 + \beta_{2,2} B^2 + \beta_{3,3} C^2 \text{ (Eq. S1):}$$

where  $Y_1 - Y_5$  are the dependent variables; A, B and C are independent variables;  $\beta_0$  is an intercept term;  $\beta_1$ ,  $\beta_2$  and  $\beta_3$  are the linear coefficients;  $\beta_{1,2}$ ,  $\beta_{1,3}$  and  $\beta_{2,3}$  are the interaction coefficients; and  $\beta_{1,1}$ ,  $\beta_{2,2}$  and  $\beta_{3,3}$  are the quadratic coefficients.

**Table S3.** The custom built (3–4)<sup>3</sup> factorial D-optimal design, with corresponding variables and their levels.

| Independent variables                                                     | Level      |       |       |       |
|---------------------------------------------------------------------------|------------|-------|-------|-------|
|                                                                           | -2         | -1    | 0     | +1    |
| (A) = concentration of amino acid based surfactant (mol/dm <sup>3</sup> ) | -          | 0.050 | 0.075 | 0.100 |
| (B) = homogenization pressure (atm)                                       | -          | 1     | 1000  | 1500  |
| (C) = type of surfactant used                                             | SLG        | SCCG  | SCMT  | SCG   |
| Dependent variables                                                       | Goal       |       |       |       |
| Y <sub>1</sub> = particle diameter (μm)                                   | Minimalize |       |       |       |
| Y <sub>2</sub> = PDI                                                      | Minimalize |       |       |       |
| Y <sub>3</sub> = TSI (0 days)                                             | Minimalize |       |       |       |
| Y <sub>4</sub> = TSI (7 days)                                             | Minimalize |       |       |       |
| Y <sub>5</sub> = TSI (30 days)                                            | Minimalize |       |       |       |

**Table S4.** A quadratic D-Optimal randomized design experimental matrix of three independent variables with their corresponding values and analyzed response factors Y<sub>1</sub> – Y<sub>5</sub>: particle diameter, PDI, TSI after 0 days, TSI after 7 days, and TSI after 30 days respectively.

| Run | A:<br>Concentration<br>of AAS<br>[mol/dm <sup>3</sup> ] | B:<br>Pressure<br>[atm] | C: AAS<br>type | Y <sub>1</sub> : diameter<br>[μm] | Y <sub>2</sub> : PDI | Y <sub>3</sub> : TSI<br>(0 days) | Y <sub>4</sub> :<br>TSI<br>(7 days) | Y <sub>5</sub> :<br>TSI<br>(30 days) |
|-----|---------------------------------------------------------|-------------------------|----------------|-----------------------------------|----------------------|----------------------------------|-------------------------------------|--------------------------------------|
| 1   | 0.05                                                    | 100                     | SCCG           | 2.71                              | 0.0542151            | 1.81525                          | 25.4135                             | 25.4135                              |
| 2   | 0.1                                                     | 0.1                     | SCG            | 5.151                             | 0.0295859            | 0.16                             | 3.35256                             | 6.9033                               |
| 3   | 0.075                                                   | 150                     | SCG            | 0.478                             | 0.0558858            | 0.090688                         | 0.0997568                           | 0.149635                             |
| 4   | 0.1                                                     | 150                     | SMCT           | 0.817                             | 0.0346218            | 1.56                             | 2.8392                              | 3.80453                              |
| 5   | 0.05                                                    | 100                     | SCG            | 0.746                             | 0.0213489            | 0.08558                          | 0.842107                            | 2.3579                               |
| 6   | 0.1                                                     | 0.1                     | SCCG           | 11.013                            | 0.140225             | 5.13                             | 79.637                              | 79.637                               |
| 7   | 0.05                                                    | 150                     | SMCT           | 0.435                             | 0.0487039            | 0.856417                         | 1.17329                             | 1.34929                              |
| 8   | 0.075                                                   | 0.1                     | SCG            | 5.151                             | 0.0295859            | 0.16                             | 3.35256                             | 6.9033                               |
| 9   | 0.1                                                     | 150                     | SCCG           | 2.247                             | 0.0956673            | 2.27014                          | 31.7819                             | 31.7819                              |
| 10  | 0.075                                                   | 100                     | SMCT           | 2.401                             | 0.0398003            | 1.94752                          | 4.96618                             | 15.3952                              |
| 11  | 0.075                                                   | 100                     | SLG            | 3.58                              | 0.032763             | 2.26                             | 4.746                               | 13.2888                              |
| 12  | 0.075                                                   | 100                     | SCCG           | 4.79                              | 0.0750234            | 2.25916                          | 36.1466                             | 36.1466                              |
| 13  | 0.075                                                   | 150                     | SCG            | 0.478                             | 0.0558858            | 0.090688                         | 0.0997568                           | 0.149635                             |
| 14  | 0.05                                                    | 150                     | SCCG           | 1.328                             | 0.0500169            | 1.74                             | 31.32                               | 31.32                                |
| 15  | 0.1                                                     | 100                     | SLG            | 4.696                             | 0.0292398            | 3.35235                          | 8.04565                             | 26.5507                              |
| 16  | 0.1                                                     | 100                     | SCG            | 2.72                              | 0.02885              | 0.1352                           | 1.55886                             | 4.67657                              |
| 17  | 0.1                                                     | 150                     | SLG            | 1.424                             | 0.0315661            | 2.4                              | 5.04                                | 8.4168                               |
| 18  | 0.05                                                    | 0.1                     | SLG            | 4.768                             | 0.0390328            | 1.41                             | 2.54                                | 5.02                                 |
| 19  | 0.05                                                    | 150                     | SLG            | 0.749                             | 0.0364509            | 1.01                             | 1.6665                              | 2.11646                              |
| 20  | 0.1                                                     | 0.1                     | SLG            | 8.322                             | 0.0239539            | 3.64386                          | 8.5774                              | 10.6937                              |
| 21  | 0.05                                                    | 0.1                     | SCCG           | 5.213                             | 0.0283024            | 2.73571                          | 25.4486                             | 25.4486                              |
| 22  | 0.1                                                     | 0.1                     | SMCT           | 5.152                             | 0.0358879            | 2.52335                          | 6.68001                             | 10.539                               |
| 23  | 0.1                                                     | 150                     | SCCG           | 2.247                             | 0.0956673            | 2.27014                          | 31.7819                             | 31.7819                              |
| 24  | 0.05                                                    | 0.1                     | SCG            | 5.151                             | 0.0295859            | 0.16                             | 3.35256                             | 6.9033                               |
| 25  | 0.05                                                    | 150                     | SLG            | 0.749                             | 0.0364509            | 1.01                             | 1.6665                              | 2.11646                              |
| 26  | 0.075                                                   | 0.1                     | SMCT           | 4.824                             | 0.033809             | 2.43                             | 5.09155                             | 8.46323                              |
| 27  | 0.1                                                     | 150                     | SMCT           | 0.817                             | 0.0346218            | 1.56                             | 2.8392                              | 3.80453                              |
| 28  | 0.05                                                    | 0.1                     | SMCT           | 3.523                             | 0.0480186            | 1.35                             | 3.19415                             | 6.71116                              |
| 29  | 0.1                                                     | 0.1                     | SCCG           | 11.013                            | 0.140225             | 5.13                             | 79.637                              | 79.637                               |
| 30  | 0.075                                                   | 0.1                     | SLG            | 6.537                             | 0.0256039            | 2.09                             | 5.17                                | 7.06                                 |
| 31  | 0.05                                                    | 150                     | SCG            | 0.186                             | 0.037461             | 0.0620756                        | 0.0651794                           | 0.0977691                            |
| 32  | 0.05                                                    | 150                     | SCG            | 0.186                             | 0.037461             | 0.0620756                        | 0.0651794                           | 0.0977691                            |

### Text S1.

The main goal of the optimization was to obtain a w/o nanoemulsion with an average particle diameter on the nanoscale (less than 500 nm, then better) and as low a monodispersity as possible, while maintaining very high stability over time period of 30 days. The goal was achieved for two formulations, i.e., NE no. 10 and NE no. 11, which fulfilled the given requirements. Nonetheless, the best emulsion turned out to be NE no. 10 (the best solution: SCG AAS, concentration 0.1 mol/dm<sup>3</sup>, fabricated under 1500 atm), which was later used in surface properties evaluation. In formulation optimization and other processes, it is common practice to make use of the answers produced by mathematical and statistical calculations using the design of experiments (DoE) and quality by design (QbD) approaches.

As is typical for RSM approaches, the ANOVA evaluation of the quadratic response surfaces predicted by a coordinate-exchange D-optimal plan for response variables  $Y_1 - Y_5$  indicated that the quadratic model offered the best matching in every instance. [S1-S3]. The derived best-fit model had significant parameters, i.e., a negligible discrepancy between the experimental, adjusted, and forecasted  $R^2$  coefficients, and a suitable number of degrees of freedom. All  $p$ -values for model fitting were less than 0.05, indicating that the terms and intercepts of the D-optimal model were significant for all dependent variables examined in this contribution. Table S5 summarizes the analysis of variance findings.

All three independent variables, i.e., concentration of AAS (A), homogenization pressure (B), and type of AAS (C), exhibited a two-factor interaction (2FI) and had the equivalent impact on the response  $Y_1$  (particle diameter), both in individual and combined effects ((A), (B), (C), and (AB), (AC), and (BC)). Therefore, an appropriate combination of process parameters at desirable levels can ensure that the produced formulation will meet the criteria for an effective w/o nanoemulsion. From the point of view of response  $Y_2$  (PDI), the main effect was observed also in terms of 2FI; however, in this case, concentration and type of AAS employed had the greatest influence on maintaining the lowest PDI values (both (A) and (B), as well as (AC)). In the case of the response factors  $Y_3$  and  $Y_4$ , the influence of independent variables (A) – (C) was exactly the same as for response  $Y_1$ . The exhibited a 2FI relationship with response factor, where all three process parameters had the same equivalent impact on the TSI values after 0 and 7 days, both individually and combined, i.e., (A), (B), and (C), as well as (AB), (AC), and (BC). Finally, for the response  $Y_5$  (TSI after 30 days), only the linear influence of all three process parameters (A), (B), and (C) was observed, with equivalent impact ( $p$ -value: <0.0001).

Those results clearly demonstrate that the type of amino-acid based (AAS) surfactant and high homogenization pressure, in conjunction with the effect of the stabilizing agent concentration, ensure the formation of a stable w/o nanoemulsion that is exceptionally effective for the removal of graffiti coating. Therefore, appropriate selection of process parameters is crucial.

The polynomial regression equations that emerged from the ANOVA analysis after fitting the experimental values of the response factors with the D-optimal model were as follows:

$$\text{Diameter (Y}_1\text{)} = +3.62 + 0.9311A - 2.57B + 0.4048C[1] + 1.50C[2] - 0.9558C[3] - 0.5726AB + 0.2668AC[1] + 0.6730AC[2] - 0.4083AC[3] - 0.0533BC[1] - 0.7567BC[2] + 0.6963BC[3] \quad (\text{Eq. S2})$$

$$\text{PDI (Y}_2\text{)} = +0.0469 + 0.0076A + 0.0004B - 0.0155C[1] + 0.0340C[2] - 0.0062C[3] - 0.0039AB - 0.0111AC[1] + 0.0290AC[2] - 0.0136AC[3] + 0.0012BC[1] - 0.0098BC[2] + 0.0012BC[3] \quad (\text{Eq. S3})$$

$$\text{TSI (0 days) (Y}_3\text{)} = +1.72 + 0.5610A - 0.4643B + 0.4359C[1] + 1.19C[2] + 0.0123C[3] - 0.2115AB + 0.4481AC[1] + 0.1991AC[2] - 0.0952AC[3] + 0.1743BC[1] - 0.6030BC[2] + 0.0537BC[3] \quad (\text{Eq. S4})$$

$$\text{TSI (7 days) (Y}_4\text{)} = +12.88 + 4.72A - 4.61B - 8.44C[1] + 29.01C[2] - 8.66C[3] - 4.24AB - 1.29AC[1] + 8.94AC[2] - 2.94AC[3] + 3.31BC[1] - 9.00BC[2] + 3.72BC[3] \quad (\text{Eq. S5})$$

$$\text{TSI (30 days) (Y}_5\text{)} = +16.02 + 5.88A - 5.04B - 6.19C[1] + 26.31C[2] - 9.47C[3] \quad (\text{Eq. S6})$$

**Table S5.** ANOVA results for D-optimal randomized design quadratic model for dependent variables of graffiti remover w/o nanoemulsion formulation.

| Source                                                                                                             | Sum of sq. | Term df | F-value | p-value  |
|--------------------------------------------------------------------------------------------------------------------|------------|---------|---------|----------|
| <i>dependent variable: diameter</i>                                                                                |            |         |         |          |
| <b>Model</b>                                                                                                       | 258.96     | 12      | 52.08   | < 0.0001 |
| A- concentration                                                                                                   | 20.03      | 1       | 48.32   | < 0.0001 |
| B - pressure                                                                                                       | 164.74     | 1       | 397.54  | < 0.0001 |
| C – AAS type                                                                                                       | 31.91      | 3       | 25.67   | < 0.0001 |
| AB                                                                                                                 | 5.95       | 1       | 14.35   | 0.0012   |
| AC                                                                                                                 | 5.66       | 3       | 4.55    | 0.0144   |
| BC                                                                                                                 | 6.42       | 3       | 5.17    | 0.0088   |
| Lack of Fit                                                                                                        | 7.87       | 13      |         |          |
| S.D. = 0.6437, Mean = 3.43, R <sup>2</sup> = 0.9705, Adj. R <sup>2</sup> = 0.9519, Pred. R <sup>2</sup> = 0.8748   |            |         |         |          |
| <i>dependent variable: PDI</i>                                                                                     |            |         |         |          |
| <b>Model</b>                                                                                                       | 0.0260     | 12      | 18.46   | < 0.0001 |
| A- concentration                                                                                                   | 0.0019     | 1       | 16.61   | 0.0006   |
| B - pressure                                                                                                       | 3.311E-06  | 1       | 0.0282  | 0.8684   |
| C – AAS type                                                                                                       | 0.0139     | 3       | 39.44   | < 0.0001 |
| AB                                                                                                                 | 0.0003     | 1       | 2.33    | 0.1436   |
| AC                                                                                                                 | 0.0074     | 3       | 20.92   | < 0.0001 |
| BC                                                                                                                 | 0.0009     | 3       | 2.59    | 0.0833   |
| Lack of fit                                                                                                        | 0.0022     | 13      |         |          |
| S.D. = 0.0108, Mean = 0.0480, R <sup>2</sup> = 0.9210, Adj. R <sup>2</sup> = 0.8711, Pred. R <sup>2</sup> = 0.6761 |            |         |         |          |
| <i>dependent variable: TSI (0 days)</i>                                                                            |            |         |         |          |
| <b>Model</b>                                                                                                       | 57.54      | 12      | 65.73   | < 0.0001 |
| A - concentration                                                                                                  | 7.39       | 1       | 101.34  | < 0.0001 |
| B - pressure                                                                                                       | 5.31       | 1       | 72.75   | < 0.0001 |
| C - APGs                                                                                                           | 30.53      | 3       | 139.48  | < 0.0001 |
| AB                                                                                                                 | 0.8110     | 1       | 11.12   | 0.0035   |
| AC                                                                                                                 | 3.04       | 3       | 13.88   | < 0.0001 |
| BC                                                                                                                 | 3.16       | 3       | 14.46   | < 0.0001 |
| Lack of fit                                                                                                        | 1.39       | 13      |         |          |
| S.D. = 0.2701, Mean = 1.68 R <sup>2</sup> = 0.9765, Adj. R <sup>2</sup> = 0.9616, Pred. R <sup>2</sup> = 0.9127    |            |         |         |          |
| <i>dependent variable: TSI (7 days)</i>                                                                            |            |         |         |          |
| <b>Model</b>                                                                                                       | 12556.06   | 12      | 30.64   | < 0.0001 |
| A - concentration                                                                                                  | 559.76     | 1       | 16.39   | 0.0007   |
| B - pressure                                                                                                       | 544.36     | 1       | 15.94   | 0.0008   |
| C - APGs                                                                                                           | 8865.84    | 3       | 86.54   | < 0.0001 |
| AB                                                                                                                 | 325.95     | 1       | 9.54    | 0.0060   |
| AC                                                                                                                 | 702.26     | 3       | 6.85    | 0.0026   |
| BC                                                                                                                 | 650.94     | 3       | 6.35    | 0.0036   |
| Lack of fit                                                                                                        | 0.0000     | 6       |         |          |
| S.D. = 5.84 Mean = 13.07 R <sup>2</sup> = 0.9509, Adj. R <sup>2</sup> = 0.9198, Pred. R <sup>2</sup> = 0.7490      |            |         |         |          |
| <i>dependent variable: TSI (30 days)</i>                                                                           |            |         |         |          |
| <b>Model</b>                                                                                                       | 9606.87    | 5       | 17.55   | < 0.0001 |
| A - concentration                                                                                                  | 800.38     | 1       | 7.31    | 0.0119   |
| B - pressure                                                                                                       | 639.40     | 1       | 5.84    | 0.0230   |
| C - APGs                                                                                                           | 7430.44    | 3       | 22.63   | < 0.0001 |
| Lack of fit                                                                                                        | 0.0000     | 6       |         |          |
| S.D. = 10.46, Mean = 15.46, R <sup>2</sup> = 0.7714, Adj. R <sup>2</sup> = 0.7275, Pred. R <sup>2</sup> = 0.6455   |            |         |         |          |

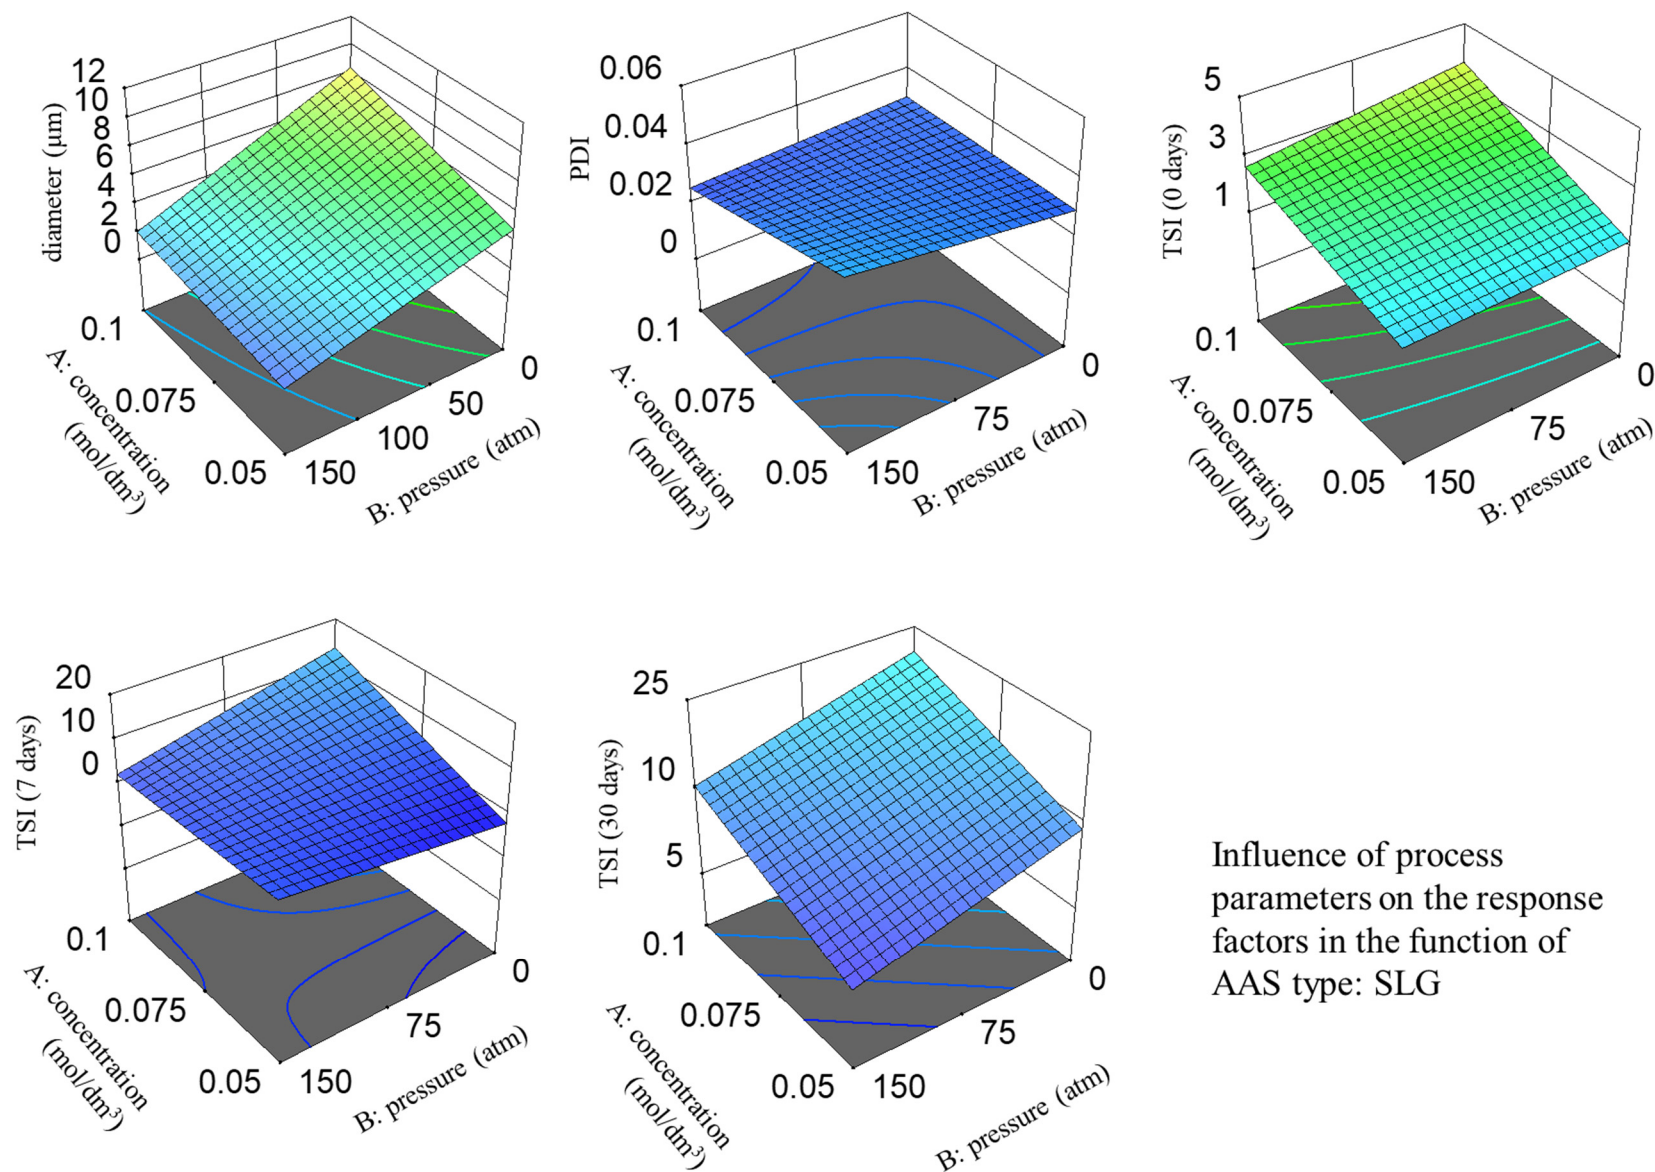

Influence of process  
parameters on the response  
factors in the function of  
AAS type: SLG

**Figure S2.** A graphical representation of the randomized quadratic *D*-optimal design response surfaces for the dependent variables  $Y_1$  = diameter,  $Y_2$  = PDI,  $Y_3$  = TSI (0 days),  $Y_4$  = TSI (7 days), and  $Y_5$  (TSI 30 days) vs. independent variables (concentration of AAS (A), HPH pressure (B) as a function of AAS type used: SLG).



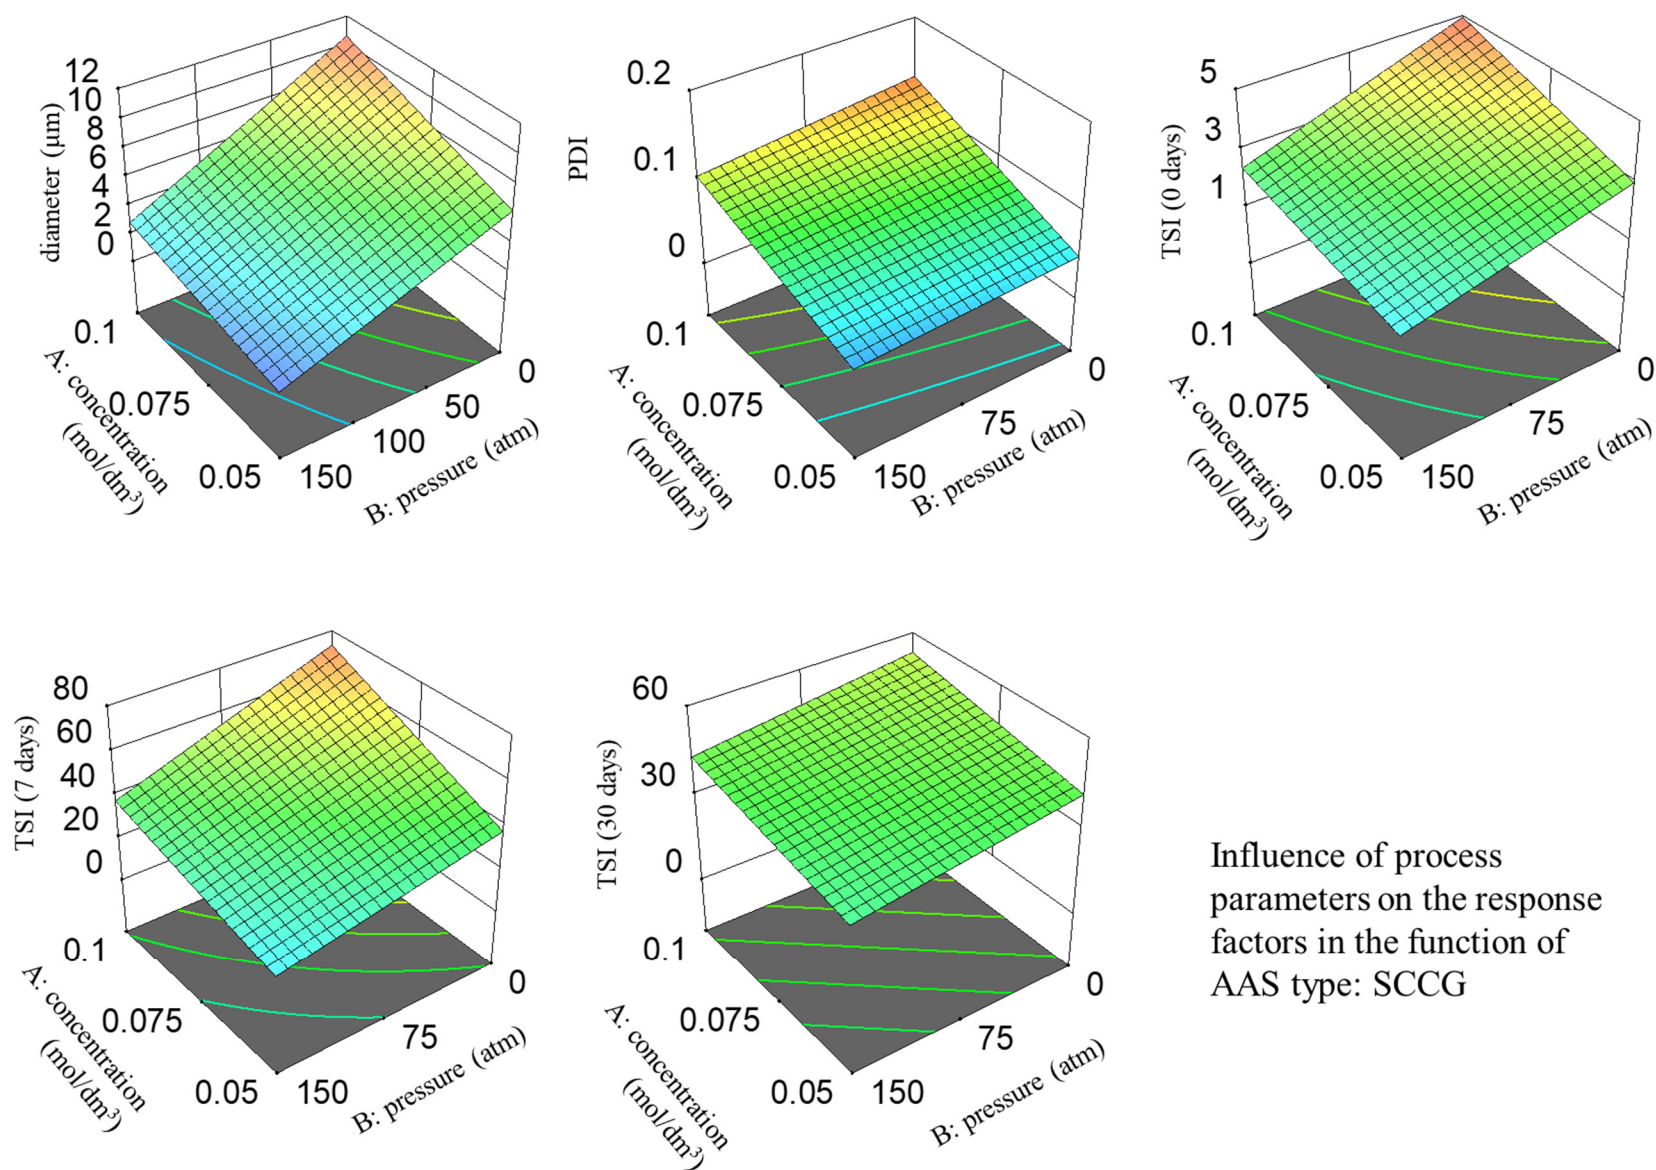

Influence of process parameters on the response factors in the function of AAS type: SCCG

**Figure S3.** A graphical representation of the randomized quadratic *D*-optimal design response surfaces for the dependent variables  $Y_1$  = diameter,  $Y_2$  = PDI,  $Y_3$  = TSI (0 days),  $Y_4$  = TSI (7 days), and  $Y_5$  (TSI 30 days) vs. independent variables (concentration of AAS (A), HPH pressure (B) as a function of AAS type used: SCCG).



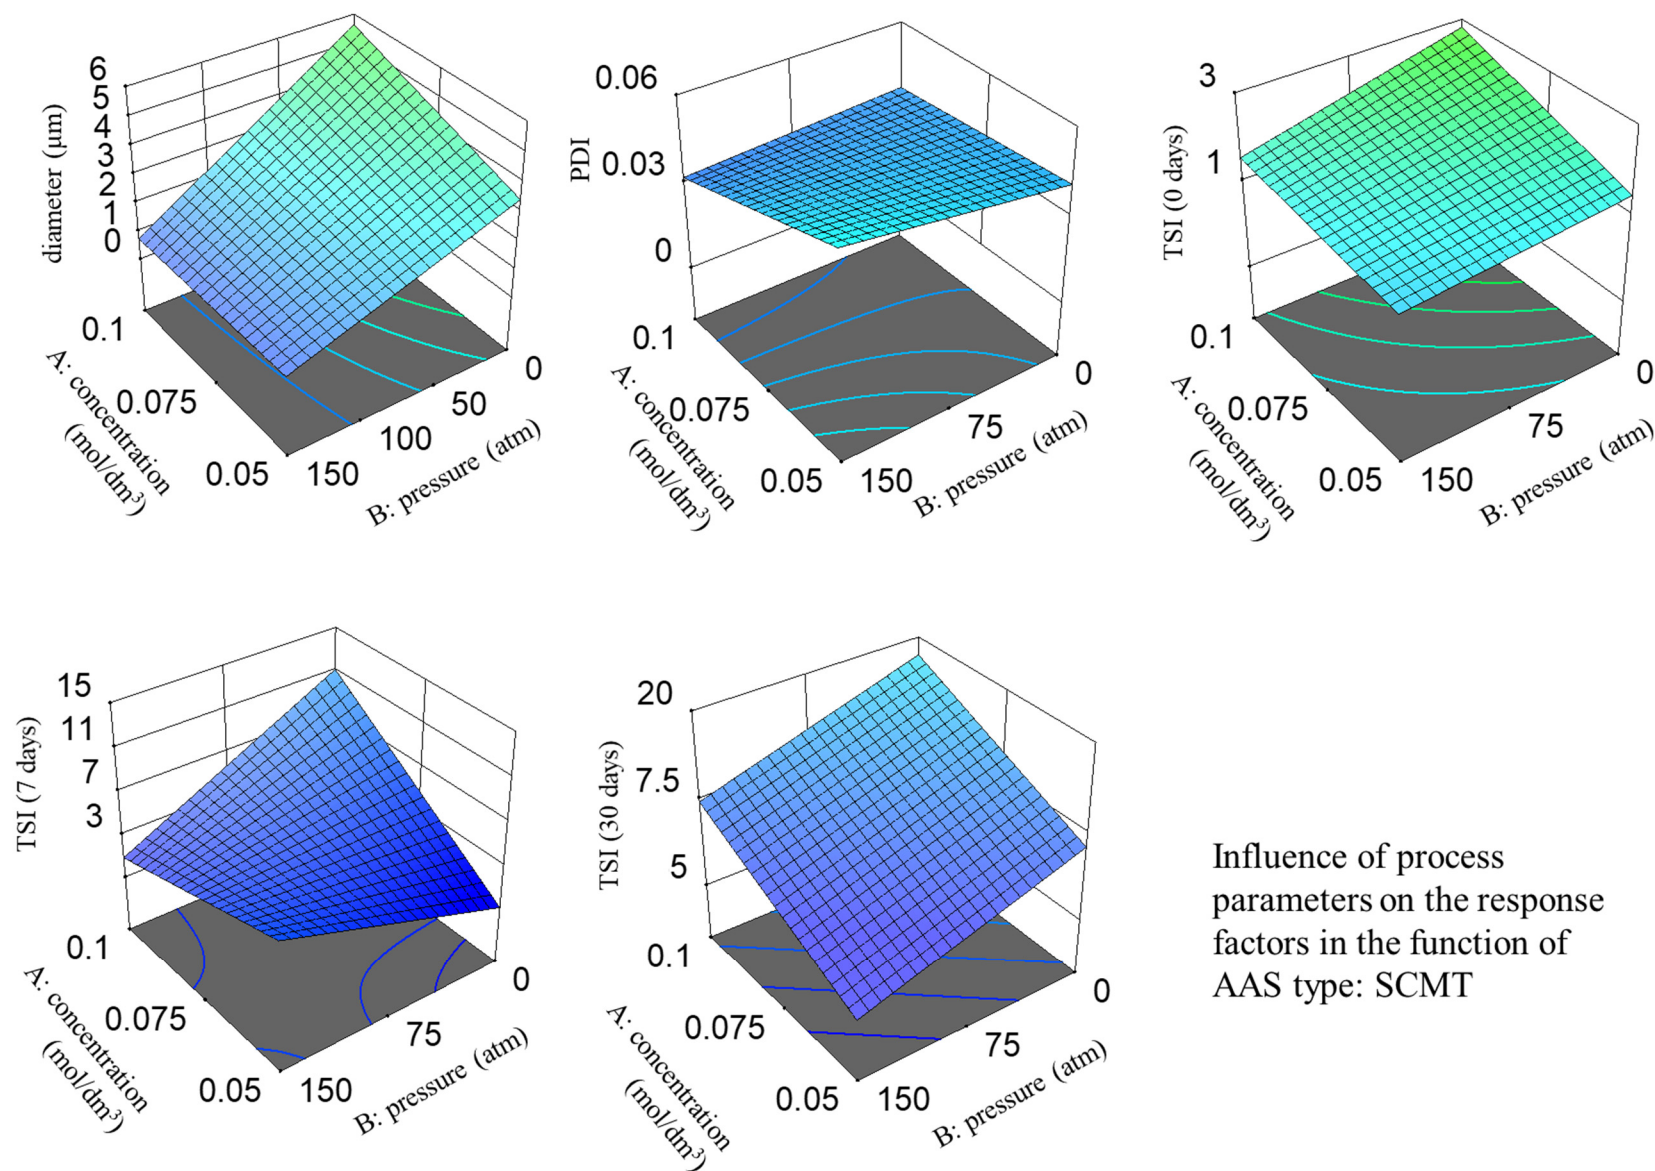

**Figure S4.** A graphical representation of the randomized quadratic *D*-optimal design response surfaces for the dependent variables  $Y_1$  = diameter,  $Y_2$  = PDI,  $Y_3$  = TSI (0 days),  $Y_4$  = TSI (7 days), and  $Y_5$  (TSI 30 days) vs. independent variables (concentration of AAS (A), HPH pressure (B) as a function of AAS type used: SCMT).

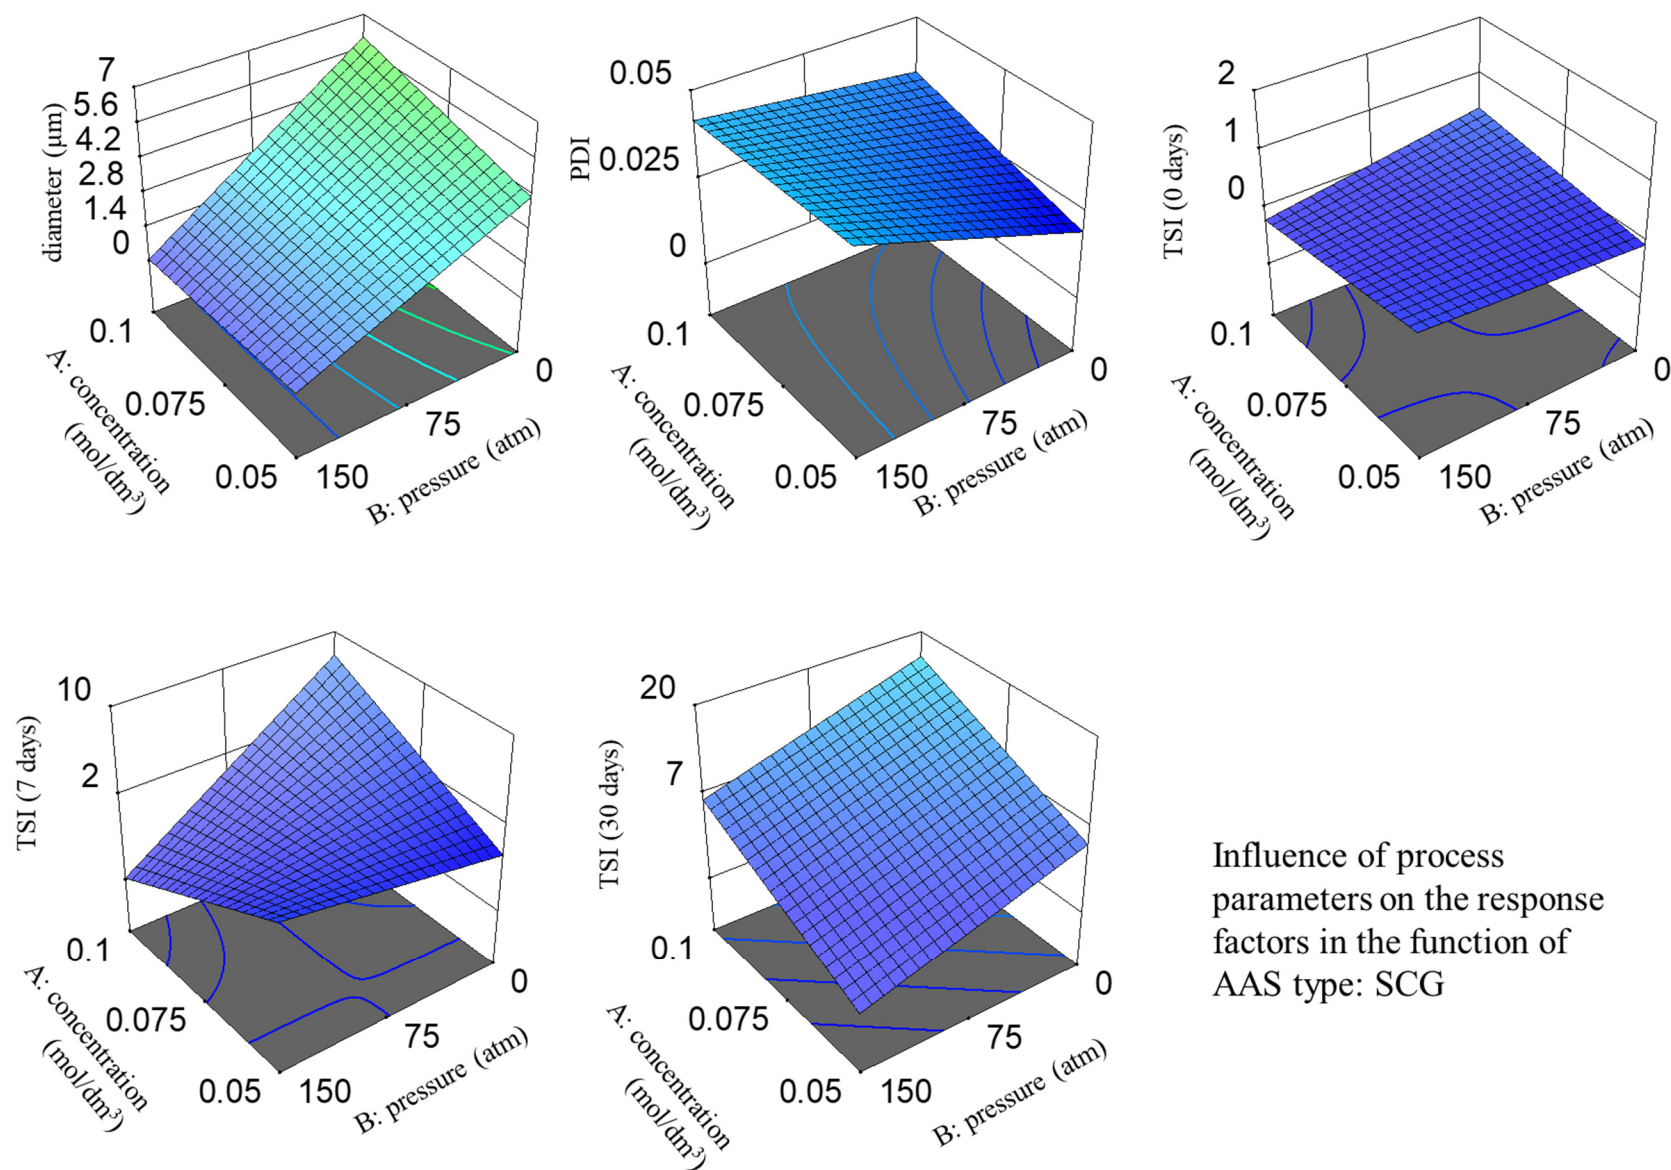

Influence of process  
parameters on the response  
factors in the function of  
AAS type: SCG

**Figure S5.** A graphical representation of the randomized quadratic *D*-optimal design response surfaces for the dependent variables  $Y_1$  = diameter,  $Y_2$  = PDI,  $Y_3$  = TSI (0 days),  $Y_4$  = TSI (7 days), and  $Y_5$  (TSI 30 days) vs. independent variables (concentration of AAS (A), HPH pressure (B) as a function of AAS type used: SCG).

## Bibliography

[S1] P. Khwanmuang, C. Naparswad, S. Archakunakorn, C. Waicharoen, C. Chitichotpanya, Optimization of in situ synthesis of Ag/PU nanocomposites using response surface methodology for self-disinfecting coatings, *Prog. Org. Coat.* 110 (2017) 104-113 <https://doi.org/10.1016/j.porgcoat.2017.03.002>

[S2] S. Balicki, Unit process optimization in the organic technology, *Przem. Chem.* 100 (2021) 490-497. <https://doi.org/10.15199/62.2021.5.10>

[S3] S. Balicki, I. Pawlaczyk-Graja, R. Gancarz, P. Capek, K.A Wilk, Optimization of Ultrasound Assisted Extraction of Functional Food Fiber from Canadian Horseweed (*Erigeron canadensis* L.), *ACS Omega*, 5(33) (2020) 20854-20862. <https://doi.org/10.1021/acsomega.0c02181>
